# Supplementary material for: A stochastic analysis based on a one-dimensional random walk model of the persistent phosphorescence of Mn2+ ions doped in zinc magnesium phosphate
Source: Royal Society of Chemistry journal article supplement (doi:10.1039/c9dt00565j), 2019-01-01
Supplement: c9dt00565j1.pdf [file c9dt00565j1.pdf]

### Supplementary information

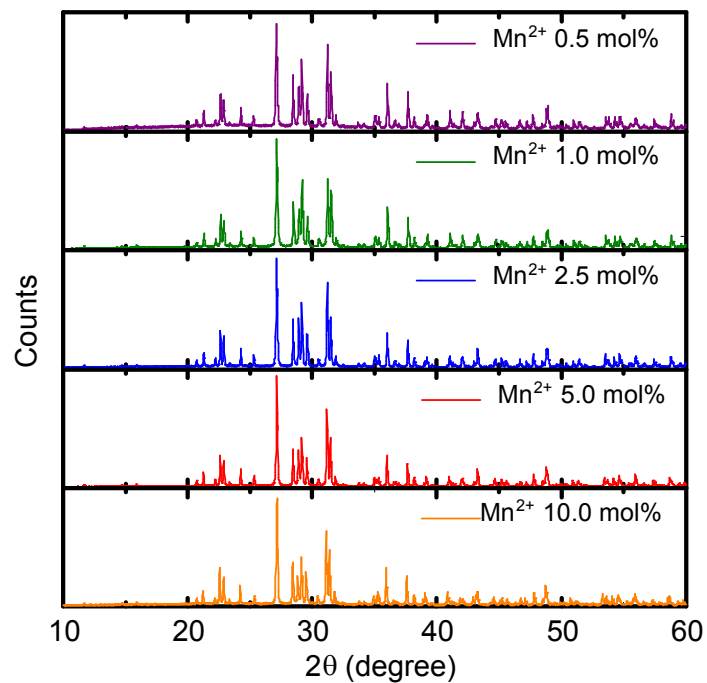

**Fig. S1.** XRD patterns for  $\beta\text{-Zn}_3(\text{PO}_4)_2\text{:Mn}^{2+y}$  ( $y = 0.005, 0.010, 0.025, 0.500, 0.100$ ). These data are in good agreement with those in PDF 00-030-1489.

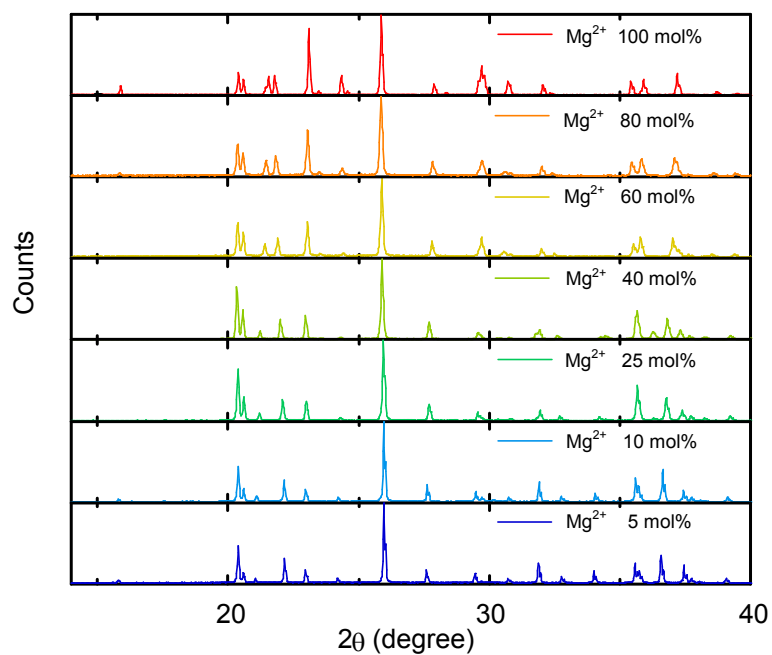

**Fig. S2.** XRD patterns for  $\gamma\text{-(Zn}_{1-x}\text{Mg}_x)_3(\text{PO}_4)_2\text{:Mn}^{2+}$  ( $x = 0.05, 0.25, 0.40, 0.60, 0.80, 1.00$ ). These data are in good agreement with those in PDF:  $\text{Zn}^{2+}\text{:Mg}^{2+}=0\text{:}100$  (PDF 00-033-0876),  $\text{Zn}^{2+}\text{:Mg}^{2+}=20\text{:}80$  (PDF 01-081-0777),  $\text{Zn}^{2+}\text{:Mg}^{2+}=40\text{:}60$  (PDF 01-081-0776),  $\text{Zn}^{2+}\text{:Mg}^{2+}=60\text{:}40$  (PDF 00-031-1468),  $\text{Zn}^{2+}\text{:Mg}^{2+}=75\text{:}25$  (PDF 01-081-0774),  $\text{Zn}^{2+}\text{:Mg}^{2+}=95\text{:}5$  (PDF 00-030-1490).

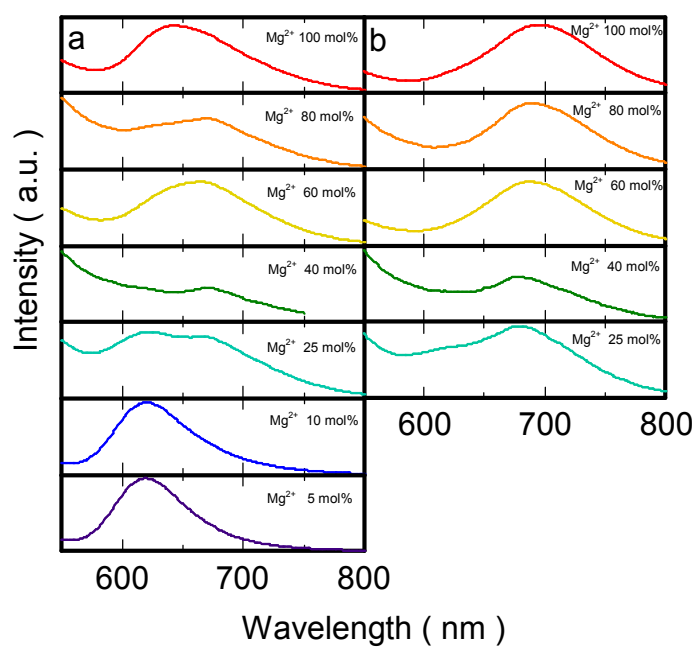

**Fig. S3.** PL emission spectra of  $\gamma$ - $(\text{Zn}_{1-x}, \text{Mg}_x)_3(\text{PO}_4)_2:\text{Mn}^{2+}_{0.05}$  ( $x = 0.05, 0.10, 0.25, 0.40, 0.60, 0.80, 1.00$ ) excited at 404 nm (a) and 416 nm (b), where  $x$  corresponds to the concentration of  $\text{Mg}^{2+}$  ion in mol% in crystal.
